# Supplementary material
Source: ML conference proceedings conference paper supplement (https://openreview.net/forum?id=CxLaZWbUjc)
Supplement: supplementary_material [file line_plots.pdf › ALIGNED/plots/fig4_line/line_plots.pdf]

**(a) Norman et al. Dataset**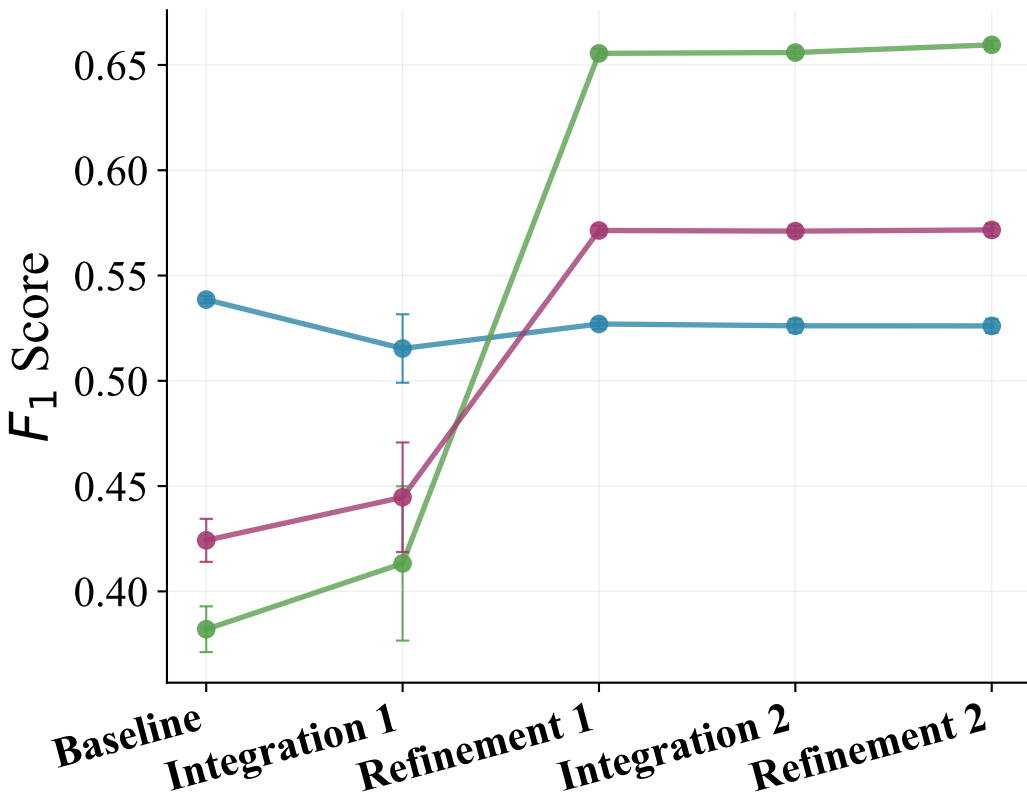**(b) Dixit et al. Dataset**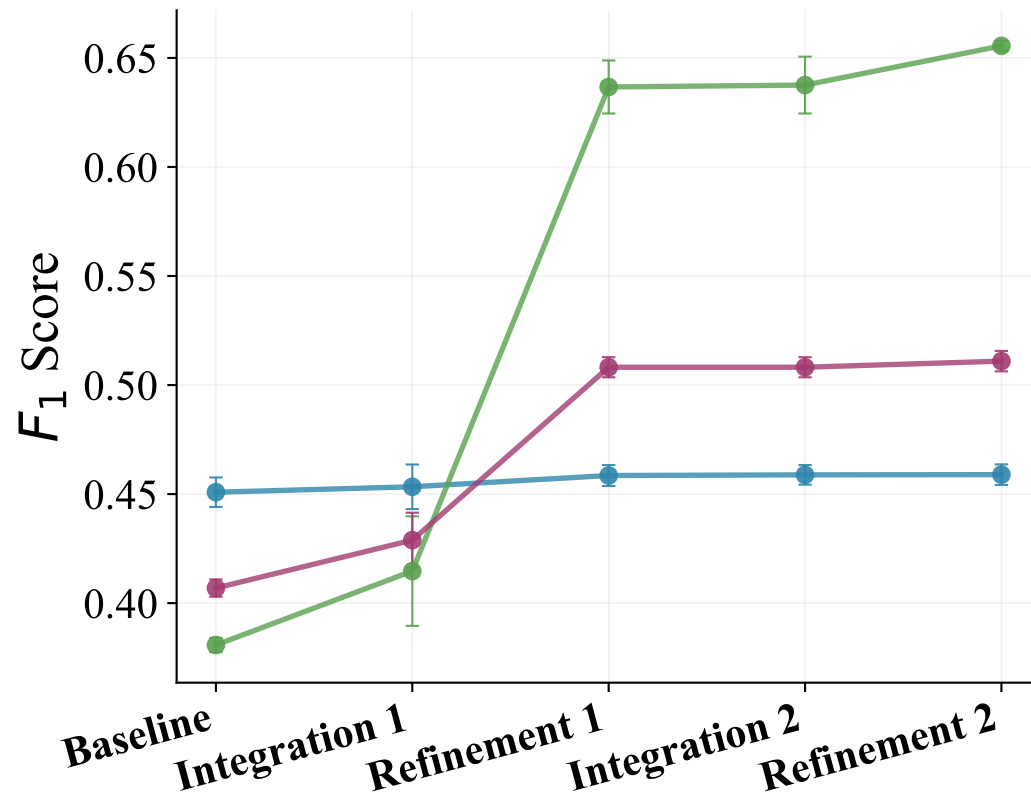**(c) Adamson et al. Dataset**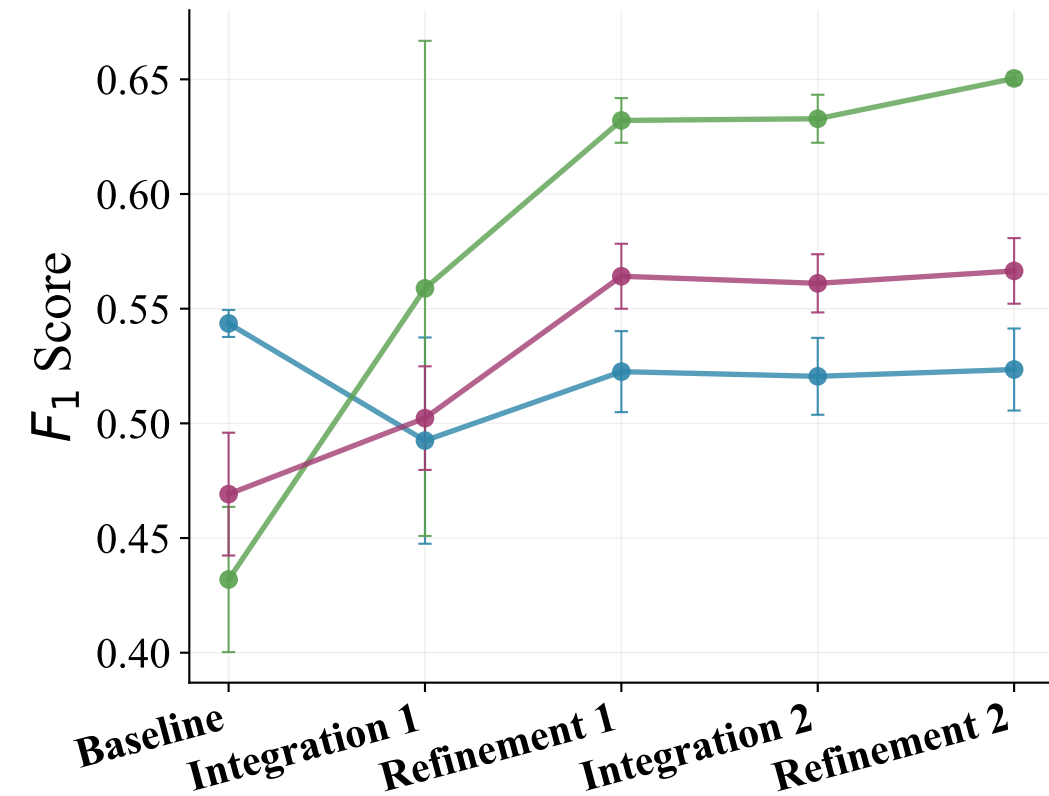

Legend: Data Consistency (blue), Knowledge Consistency (green), Balanced Consistency (purple)
