# Supplementary material
Source: ML conference proceedings conference paper supplement (https://openreview.net/forum?id=CxLaZWbUjc)

(a) OmniPath KB vs Norman

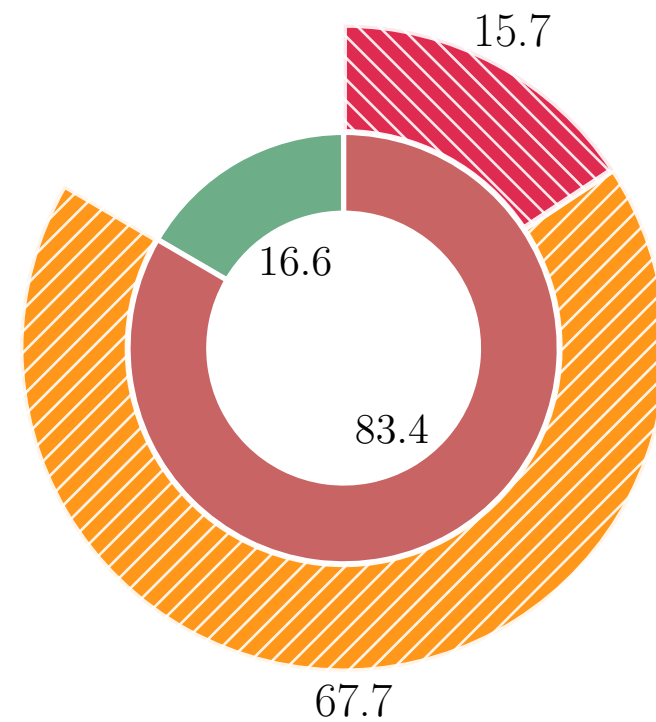

(b) GO KB vs Norman

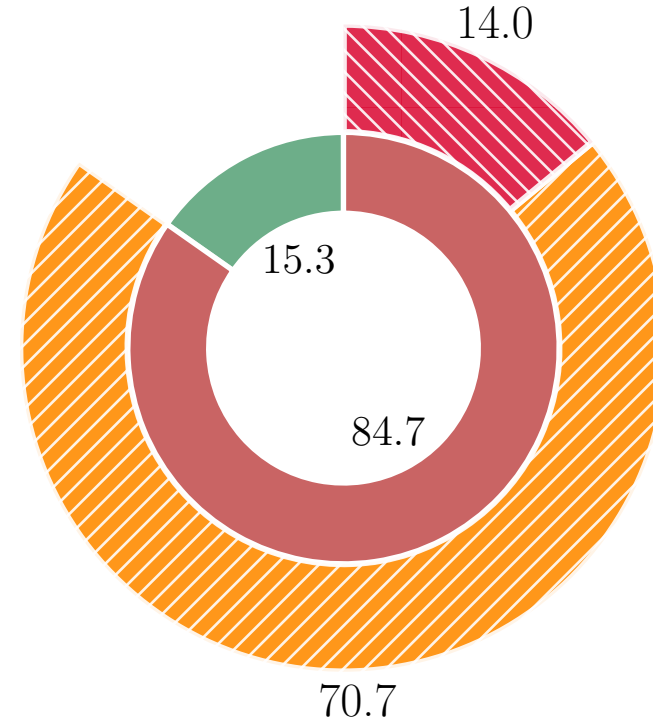

(c) EcoCyc KB vs Precise1K

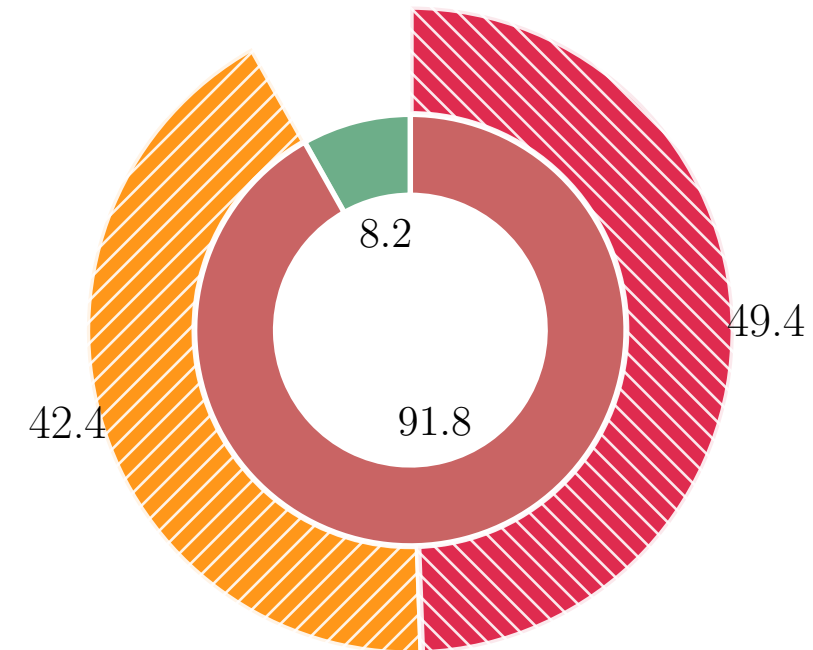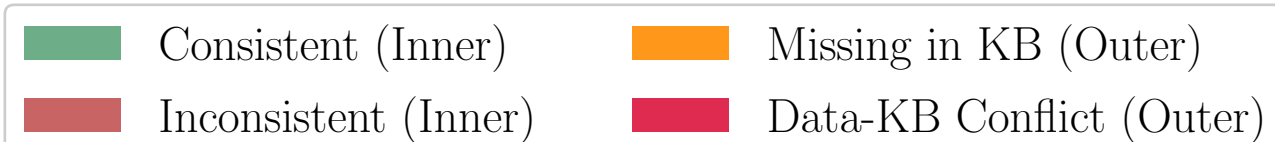

Supplement: supplementary_material [file piechart.pdf › ALIGNED/plots/fig1_incons/piechart.pdf]

**(a) Norman et al. Dataset**

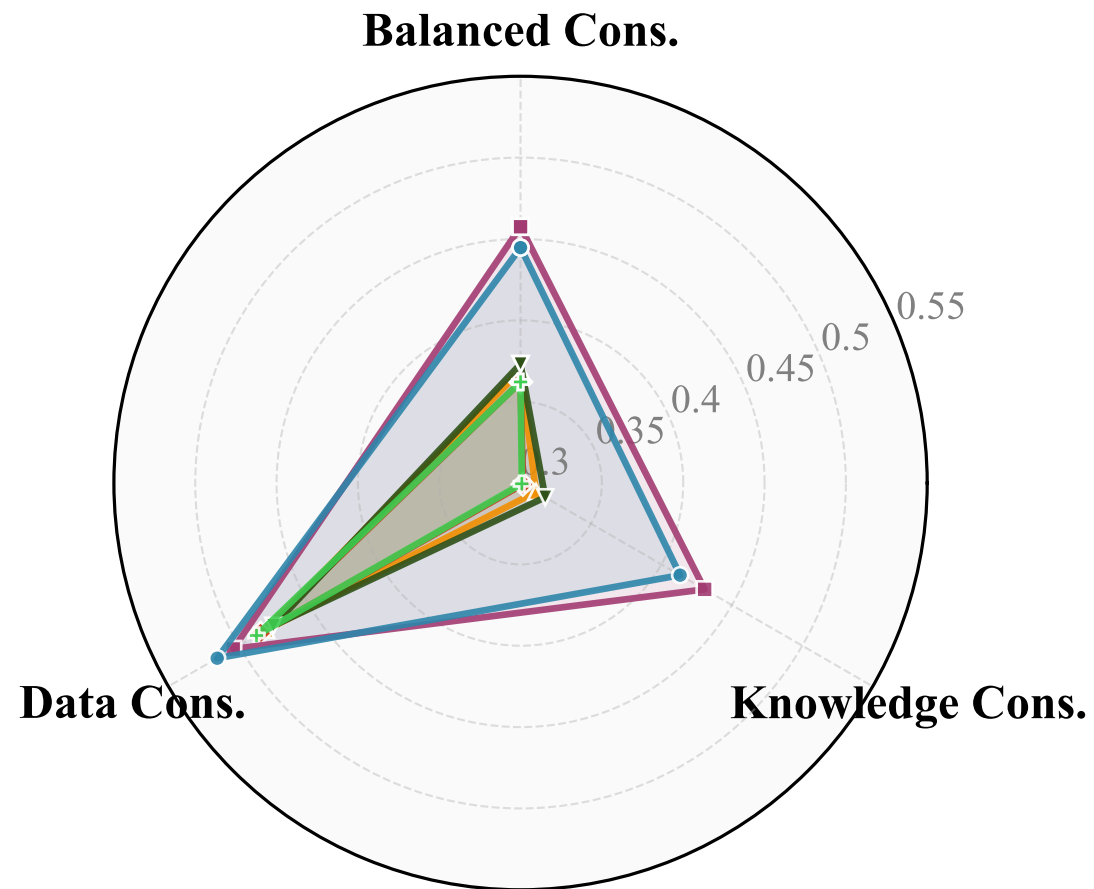

**(b) Dixit et al. Dataset**

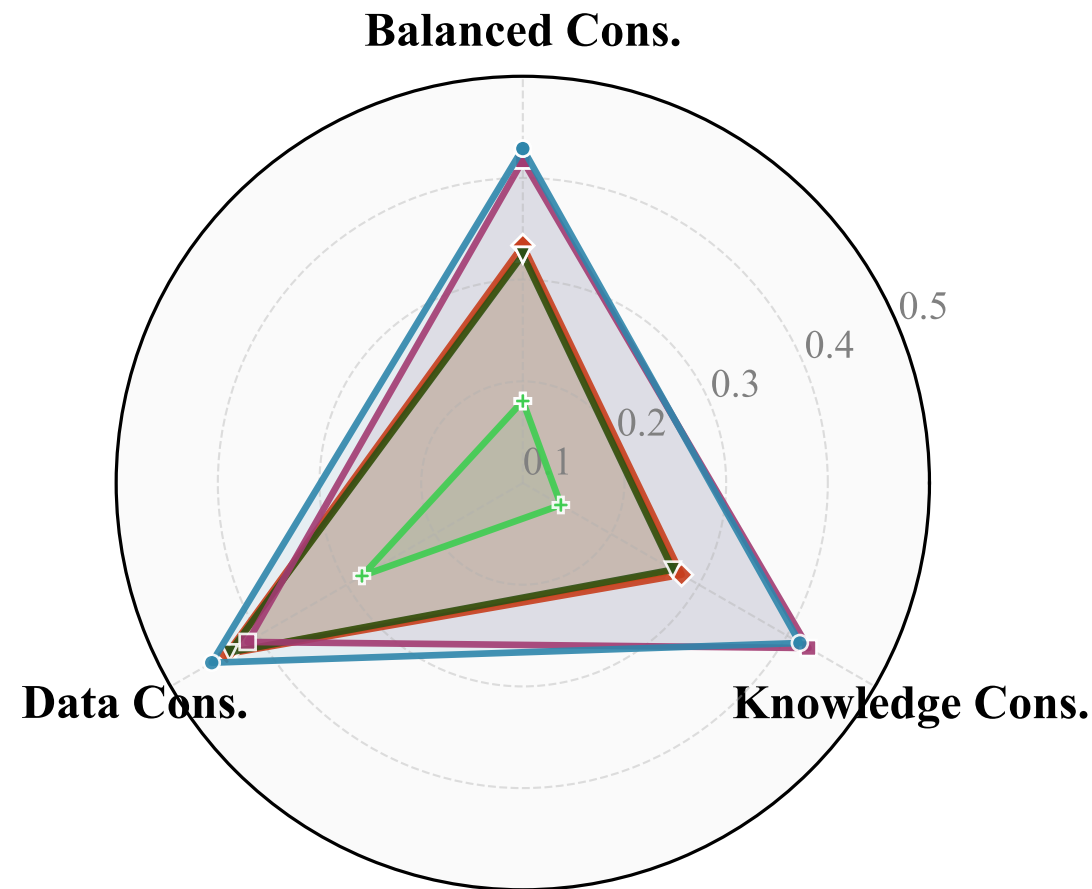

**(c) Adamson et al. Dataset**

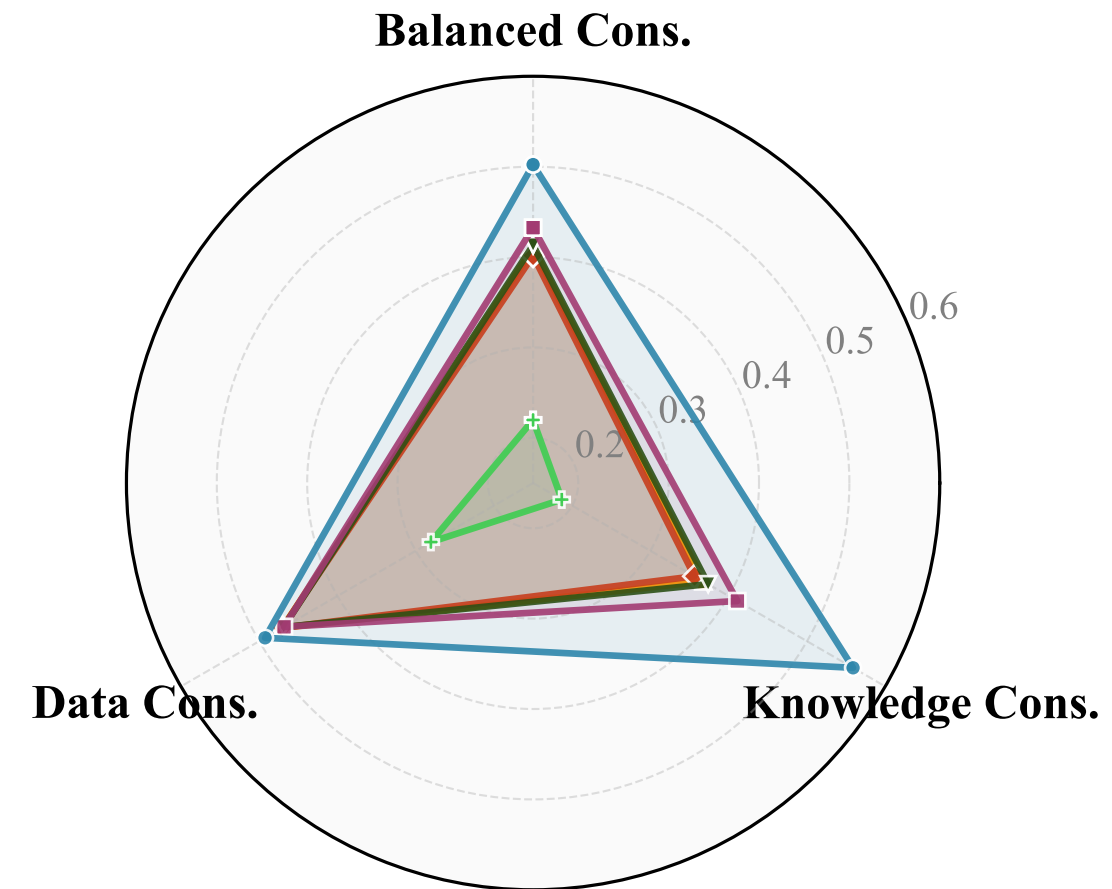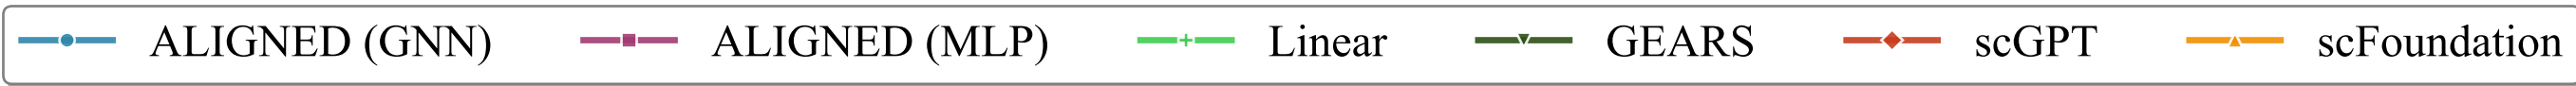

Supplement: supplementary_material [file radar_plots.pdf › ALIGNED/plots/fig3_radar/radar_plots.pdf]

**(a) Interaction Accuracy**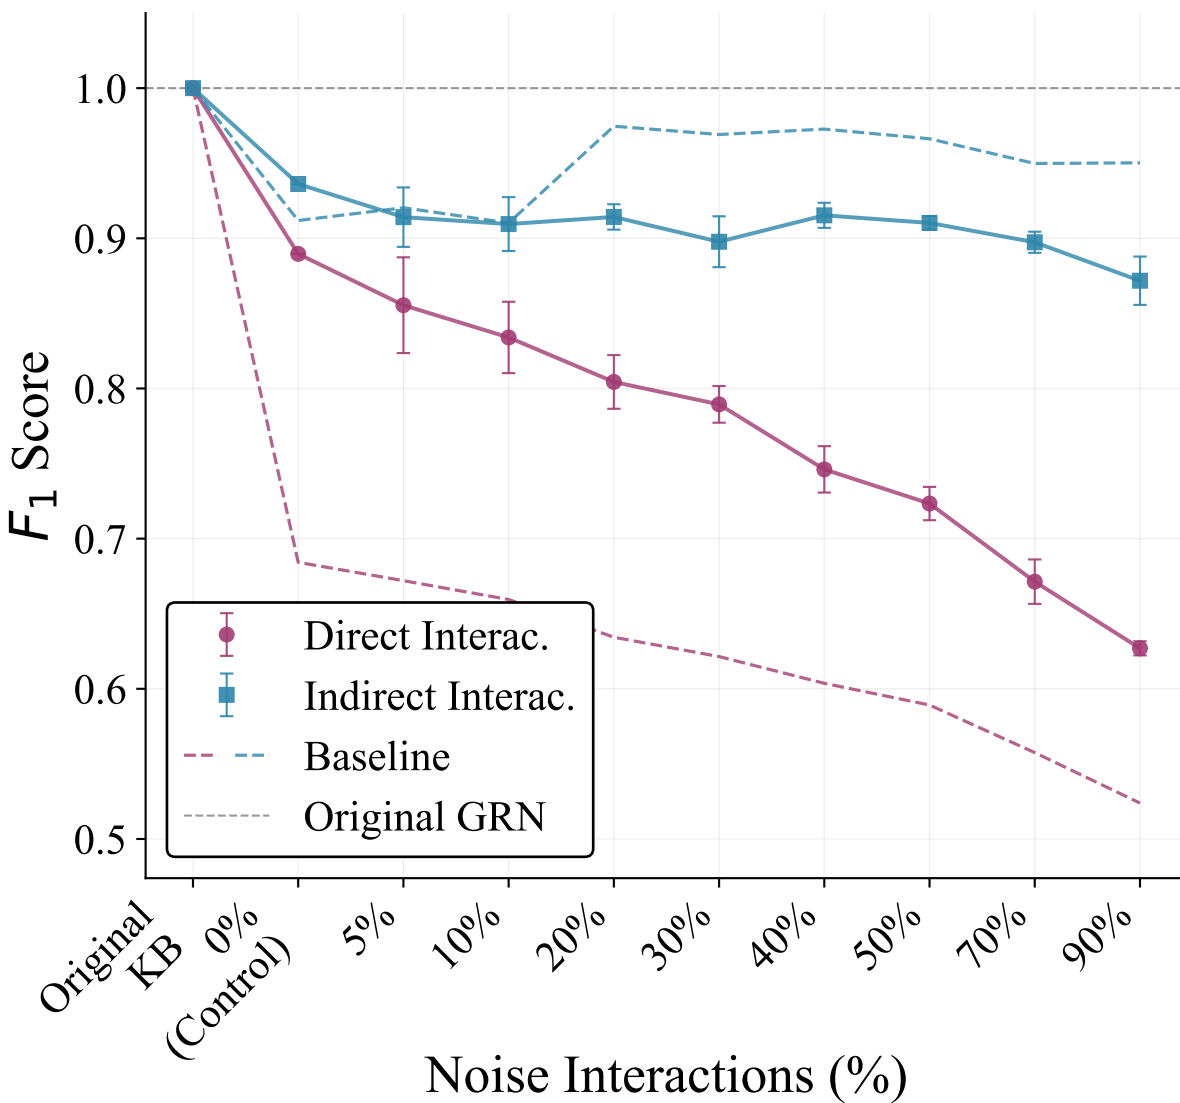**(b) Network Topology**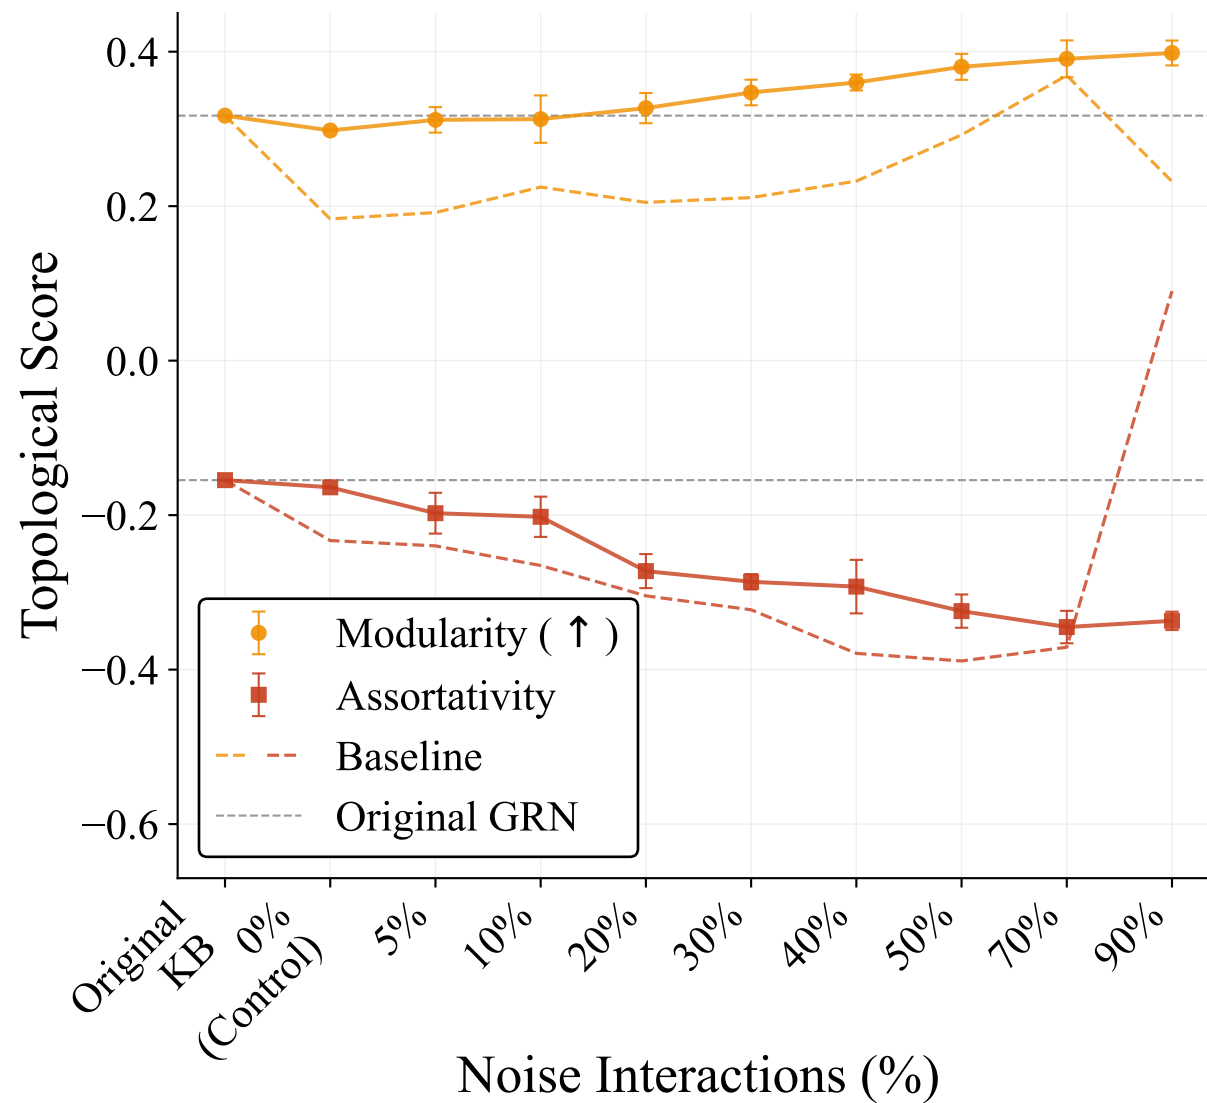**(c) Pathway Enrichment Scores**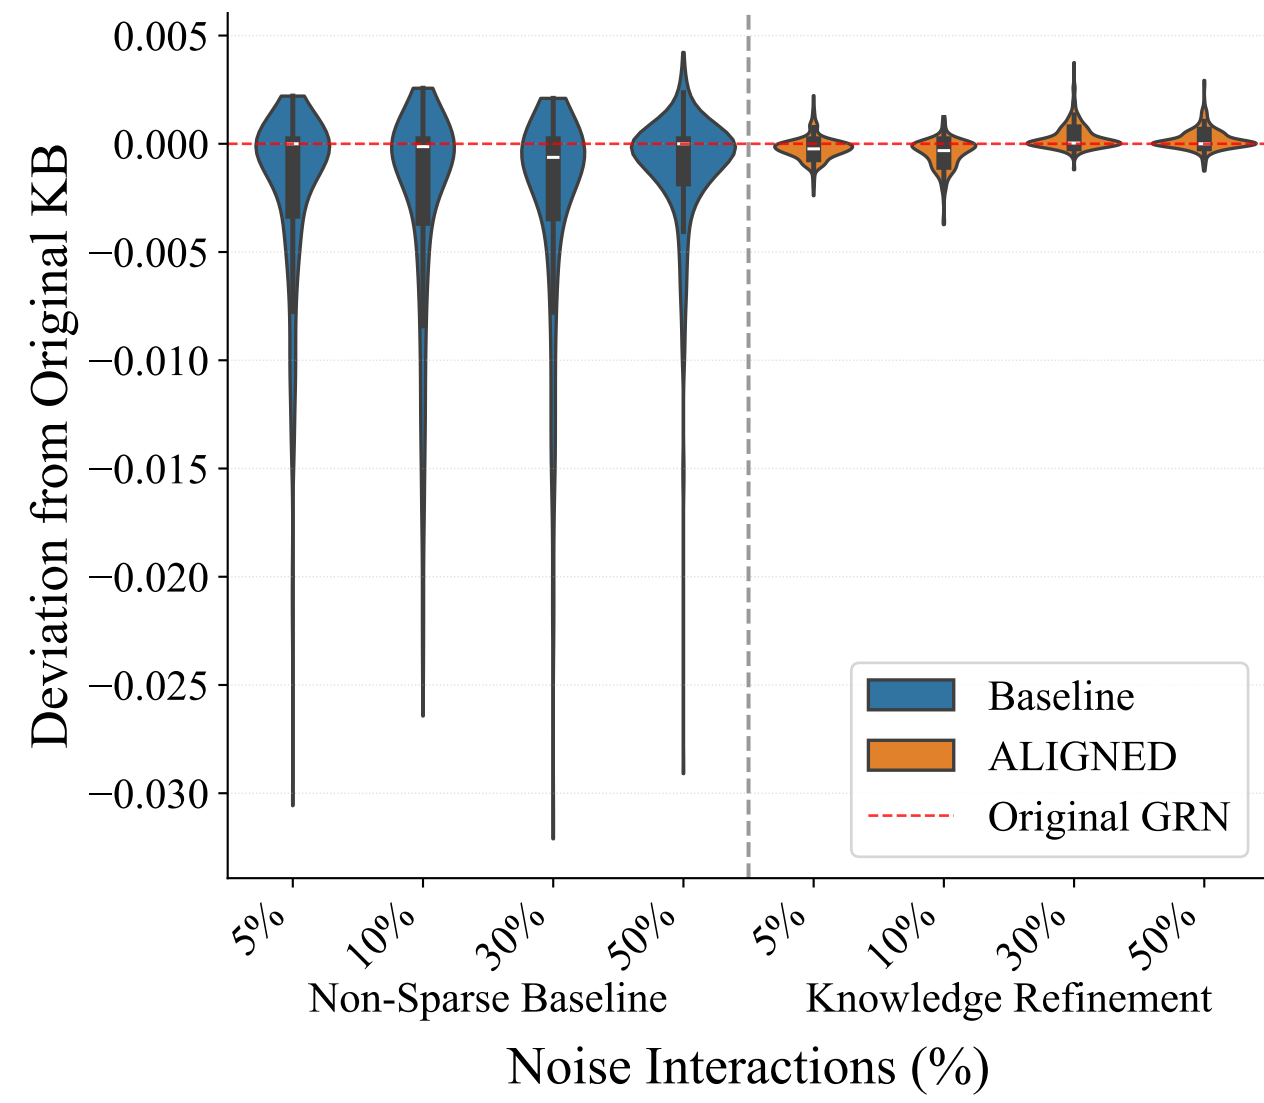

Supplement: supplementary_material [file reconstruction.pdf › ALIGNED/plots/fig5_refine/reconstruction.pdf]

Reconstruction accuracy

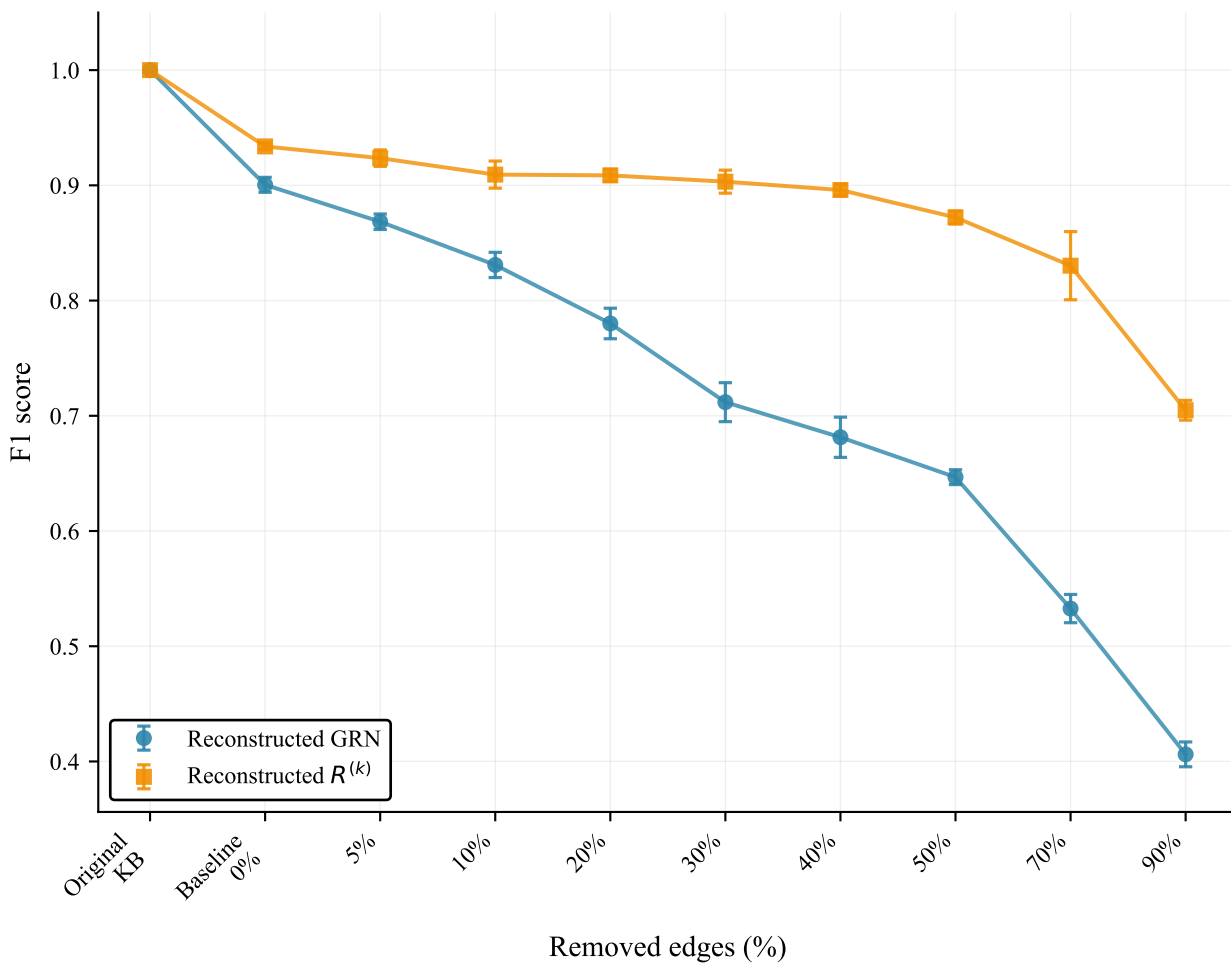

Structural properties of reconstructed networks

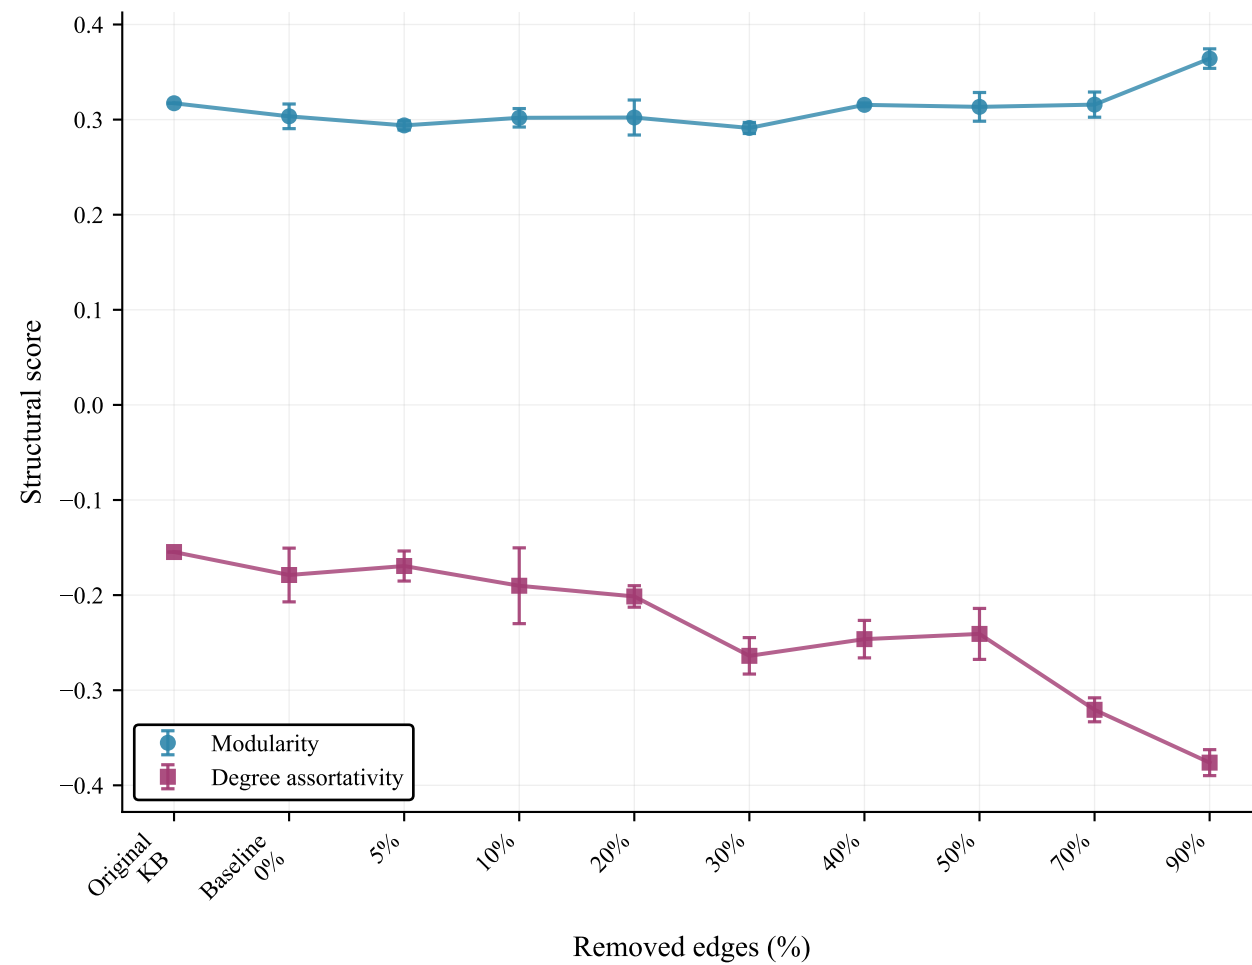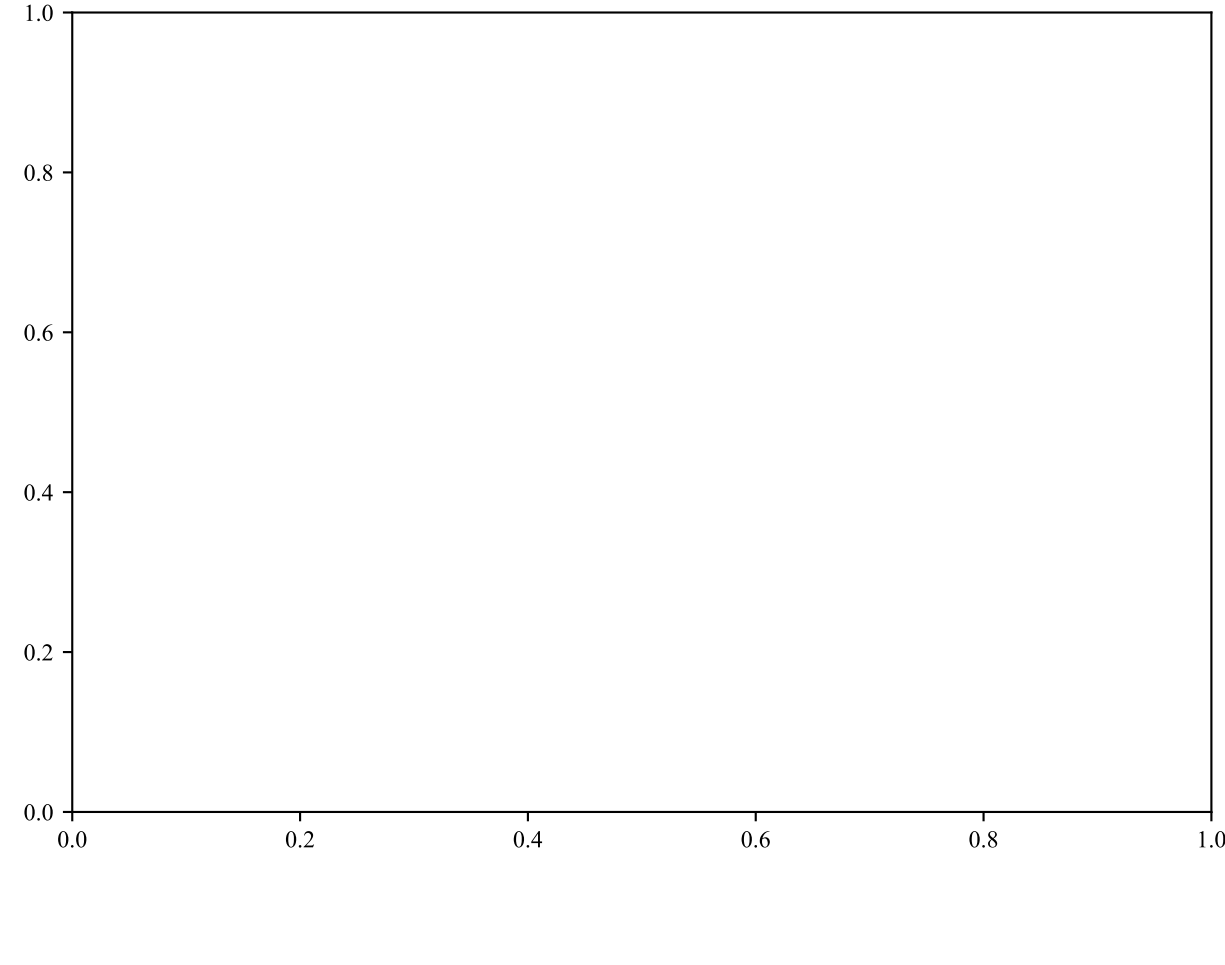

Supplement: supplementary_material [file reconstruction_remove.pdf › ALIGNED/plots/fig5_refine/reconstruction_remove.pdf]
